# Supplementary material
Source: publisher figshare collection journal article supplement (https://gsapubs.figshare.com/ndownloader/files/23292158)
Supplement: Supplementary file 1 [file 23292158]

# GSA DATA REPOSITORY 2011114

## Supplemental Information for

## Coupled Deep-Water Flow and Climate Variability in the Mid-Pleistocene North Atlantic

H. F. Kleiven, I.R. Hall, I. N. McCave, G. Knorr, E. Jansen

Table DR1. Onset time of planktonic  $\delta^{18}\text{O}$ ,  $\overline{\text{SS}}$ , and IRD relative to benthic  $\delta^{18}\text{O}$ ,  $\delta^{13}\text{C}$  shifts for 12 significant\*  $\delta^{13}\text{C}$  excursions

| Event #  | Age ka | benthic $\delta^{18}\text{O}$ vs $\delta^{13}\text{C}$ decrease | $\overline{\text{SS}}$ increase vs benthic $\delta^{18}\text{O}$ light | Benthic $\delta^{18}\text{O}$ vs planktonic $\delta^{18}\text{O}$ | IRD vs benthic $\delta^{18}\text{O}$                                                  |
|----------|--------|-----------------------------------------------------------------|------------------------------------------------------------------------|-------------------------------------------------------------------|---------------------------------------------------------------------------------------|
| 1        | 762.42 | S                                                               | No SS shift                                                            | no plank shift                                                    | 3 pt before, -410 a                                                                   |
| 2        | 767.81 | S                                                               | 1 pt later, 300 a                                                      | 2 pt later, 610 a                                                 | S                                                                                     |
| 3        | 772.96 | S                                                               | 5 pt later, 1500 a                                                     | S                                                                 | 3 pt later                                                                            |
| 4        | ~777.2 | C lead ? gap                                                    | Indet, but prob SS lead; gap in O ben                                  | At least 8 pt later, 1100 a                                       | At least 6 pt later                                                                   |
| 5; T'IX' | 789.73 | O lead, 1 pt, >100 a                                            | 3pt later, 390 a                                                       | > 2 pt later, > 220 a                                             | 5 pt later but signif background                                                      |
| 6        | 803.34 | S                                                               | 6 pt later, 1955 a                                                     | 6 pt later, 1955 a                                                | 4 pt later, 325 a                                                                     |
| 7        | 812.12 | S                                                               | 2 pt later, 650 a                                                      | 1 pt later, 330 a                                                 | 4 pt later, 1300 a                                                                    |
| 8        | 824.87 | S                                                               | 3 pt later, 1310 a                                                     | 2 pt later, 880 a                                                 | 2 pt later, 120 a                                                                     |
| 9        | 833.2  | $\delta^{13}\text{C}$ is 4 pt later, 1310 a                     | 2 pt before/4 pt later, -450 a/1310a                                   | 4 pt later, 1310 a. (S with $\delta^{13}\text{C}$ )               | 8 pt later, 2280 a                                                                    |
| 10       | 844.63 | S                                                               | 1 pt later, 90 a                                                       | 5 pt later, 400 a                                                 | S & 4pt & 8pt                                                                         |
| 11; T'X' | 867.12 | S                                                               | 2 pt later, 330 a                                                      | 2 pt before, -590 a                                               | S                                                                                     |
| Summary  |        | Mainly S                                                        | -450 to +1955<br>Avge exc #8 = 815 a (870 a inc 8+, 675 a inc 8-)      | -590 to +1955<br>Avge inc #10 = 640 a (815 a exc)                 | Mainly later by >800 a<br>IRD main pulse $\approx \delta^{18}\text{O}_{\text{plank}}$ |

\* The excursions (except # 4 and 9) were defined by being lower than 0.25 ‰ less than the local mean  $\delta^{13}\text{C}$  estimated by the regression of  $\delta^{13}\text{C}$  on age. ( $\delta^{13}\text{C} = 2.400 - 0.002405 t$ , where  $t$  is age in ka). Most of the benthic  $\delta^{13}\text{C}$  spikes start at the same sample as the benthic  $\delta^{18}\text{O}$  rise. S = simultaneous, i.e same sample. 'pt' = data point

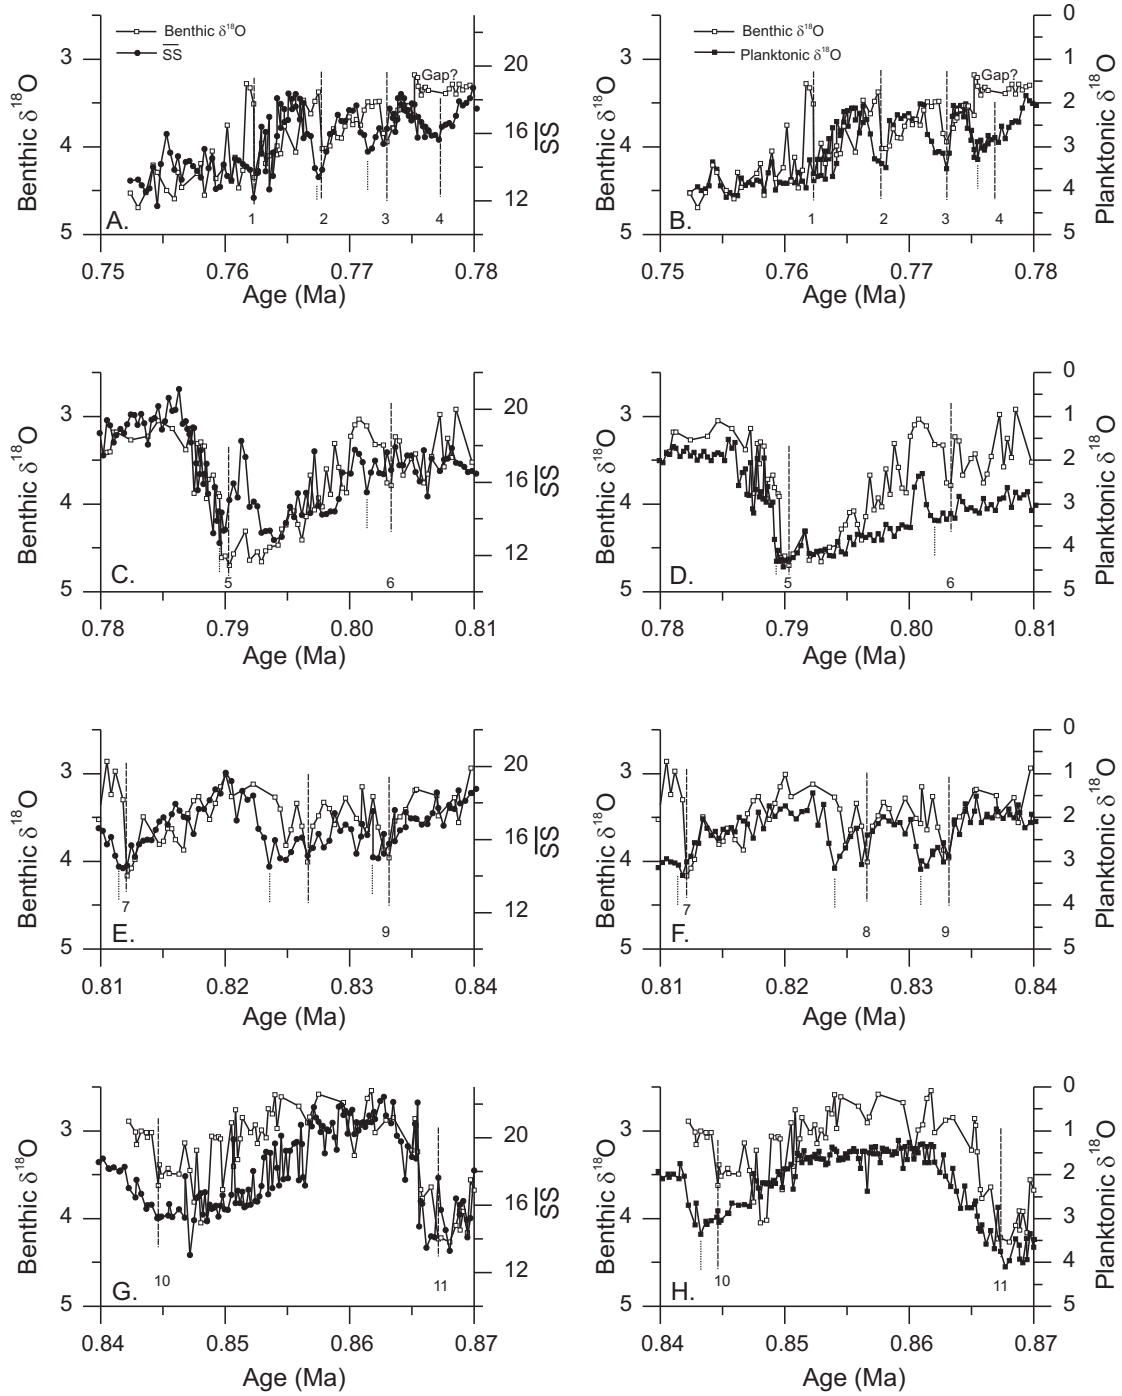

Fig. DR1. Detailed plots of (left) benthic  $\delta^{18}\text{O}$  and  $\overline{\text{SS}}$  and (right) benthic and planktonic  $\delta^{18}\text{O}$  showing the phasing between them. The numbered vertical dashed line on each plot marks the start of a  $\delta^{18}\text{O}$  (and  $\delta^{13}\text{C}$ ) excursion and the following dotted line shows the start of the excursion in  $\overline{\text{SS}}$  and planktonic  $\delta^{18}\text{O}$ . Where there is one line they are simultaneous (e.g. 0.867 Ma in  $\delta^{18}\text{O}$ ).

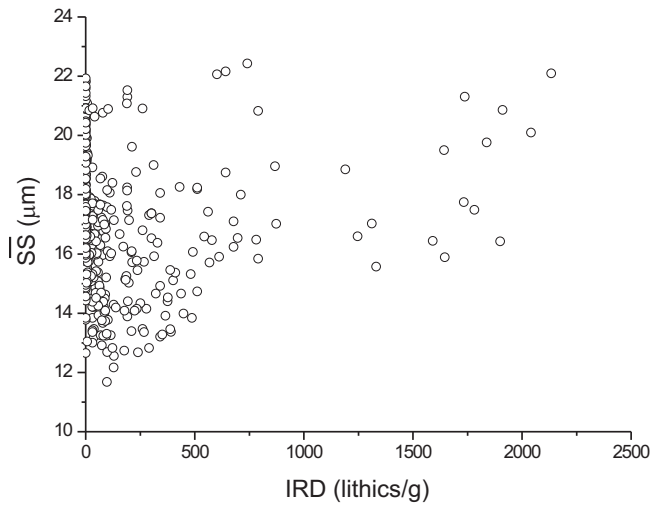

Fig. DR2. A further demonstration that the  $\overline{SS}$  size is not significantly affected by the introduction of ice-rafted debris (IRD) during the studied interval is shown by the absence of correlation between  $\overline{SS}$  and concentration of IRD in the sand fraction.

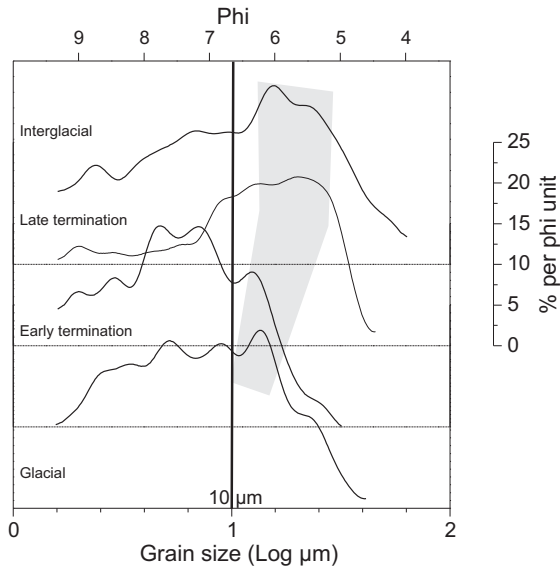

Fig. DR3 Grain size distributions from selected periods in a cycle showing the sorting changes of (a) increase in the  $\overline{SS}$  grain size and SS % and (b) decrease in the %<10  $\mu\text{m}$  fine silt-clay associated with increasing flow speed from glacial through the termination to interglacial.  $\Phi = -\log_{10} d$  ( $d$ = diameter of particle in mm).
